# Supplementary material for: Self-fertilization, sex allocation and spermatogenesis kinetics in the hypodermically-inseminating flatworm Macrostomum pusillum
Source: Oxford University Press journal article supplement (doi:10.1242/jeb.149682), 2017-01-01
Supplement: jeb149682supp.pdf [file jeb149682supp.pdf]

## **Table S1**

[Click here to Download Table S1](#)
